# Supplementary material
Source: PubMed Central journal article supplement (PMC3644318)
Supplement: NIHMS458496-supplement-01.pdf [file NIHMS458496-supplement-01.pdf]

**Supplemental Table 1** Annotation and minor allele frequencies for TRIM SNPs of interest.

| Gene   | Chromosome | rsID       | Chromosomal position | Gene location | Major allele | Minor allele | MAF Caucasians | MAF African-Americans |
|--------|------------|------------|----------------------|---------------|--------------|--------------|----------------|-----------------------|
| TRIM25 | 17         | rs11540270 | 52321803             | 3UTR          | A            | G            | 7%             | 12%                   |
|        |            | rs2525998  | 52322526             | 3UTR          | G            | A            | 29%            | 41%                   |
|        |            | rs2525997  | 52326239             | intron        | A            | C            | 9%             | 14%                   |
|        |            | rs205499   | 52327399             | intron        | G            | A            | 21%            | 24%                   |
|        |            | rs2525996  | 52331302             | intron        | G            | C            | 25%            | 13%                   |
|        |            | rs2525994  | 52331920             | intron        | A            | C            | 25%            | 18%                   |
|        |            | rs2525993  | 52332778             | intron        | A            | G            | 25%            | 14%                   |
|        |            | rs205498   | 52333792             | coding        | A            | G            | 24%            | 23%                   |
|        |            | rs7225205  | 52335979             | intron        | G            | A            | 12%            | 25%                   |
|        |            | rs9909750  | 52337801             | intron        | G            | A            | 12%            | 18%                   |
|        |            | rs2525992  | 52343180             | intron        | A            | G            | 25%            | 16%                   |
|        |            | rs169530   | 52343239             | intron        | G            | A            | 19%            | 11%                   |
|        |            | rs11869863 | 52348353             | flanking_5UTR | T            | A            | 13%            | 18%                   |
| TRIM5  | 11         | rs7943397  | 5639521              | flanking_3UTR | C            | G            | 41%            | 24%                   |
|        |            | rs7122620  | 5640142              | flanking_3UTR | A            | G            | 46%            | 47%                   |
|        |            | rs11038628 | 5645515              | coding        | G            | A            | 6%             | 24%                   |
|        |            | rs12808061 | 5646550              | intron        | C            | A            | 12%            | 27%                   |
|        |            | rs12271333 | 5647266              | intron        | A            | C            | 12%            | 16%                   |
|        |            | rs16934050 | 5648364              | intron        | C            | A            | 6%             | 25%                   |
|        |            | rs904375   | 5648555              | intron        | G            | A            | 18%            | 47%                   |
|        |            | rs3740994  | 5656376              | intron        | A            | C            | 15%            | 11%                   |
|        |            | rs3740995  | 5656915              | coding        | G            | A            | 14%            | 22%                   |
|        |            | rs10769175 | 5657224              | intron        | G            | A            | 20%            | 48%                   |
|        |            | rs10838525 | 5657576              | coding        | G            | A            | 37%            | 20%                   |
|        |            | rs11601507 | 5657649              | coding        | C            | A            | 7%             | 1%                    |
|        |            | rs3740996  | 5657856              | coding        | G            | A            | 12%            | 8%                    |
|        |            | rs3824949  | 5657984              | UTR           | C            | G            | 44%            | 74%                   |
|        |            | rs7124435  | 5658394              | intron        | A            | G            | 2%             | 11%                   |
|        |            | rs17305868 | 5658458              | intron        | G            | A            | 48%            | 48%                   |
|        |            | rs7127767  | 5658674              | intron        | A            | G            | 47%            | 48%                   |

| Gene | Chromosome | rsID       | Chromosomal position | Gene location | Major allele | Minor allele | MAF Caucasians | MAF African-Americans |
|------|------------|------------|----------------------|---------------|--------------|--------------|----------------|-----------------------|
|      |            | rs12278842 | 5660133              | intron        | G            | C            | 47%            | 46%                   |
|      |            | rs3802981  | 5663098              | flanking_5UTR | A            | G            | 48%            | 48%                   |

3UTR, three-prime untranslated region; 5UTR, five-prime untranslated region; MAF, minor allele frequency; one SNP having a MAF of 74% in African-Americans is the result of requiring consistent alleles between cohorts.
